# Supplementary material for: A First Encounter of Residents of a Long-Term Care Facility with Virtual Reality Glasses
Source: Preprints.org preprint supplement (doi:10.20944/preprints201809.0410.v1), 2018-09-20
Supplement: Supplementary file 1 [file supplementary]

# Virtual Reality for Seniors:

A First Encounter of Residents of a Long-Term Care Facility  
with VR

---

Victoria Mühlegger

Akademie für Altersforschung am  
HAUS DER BARMIGKEIT



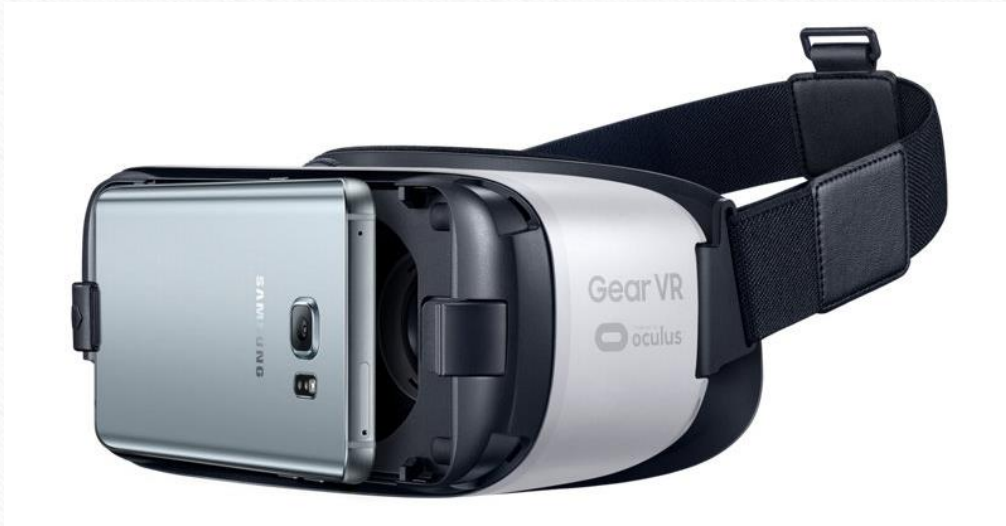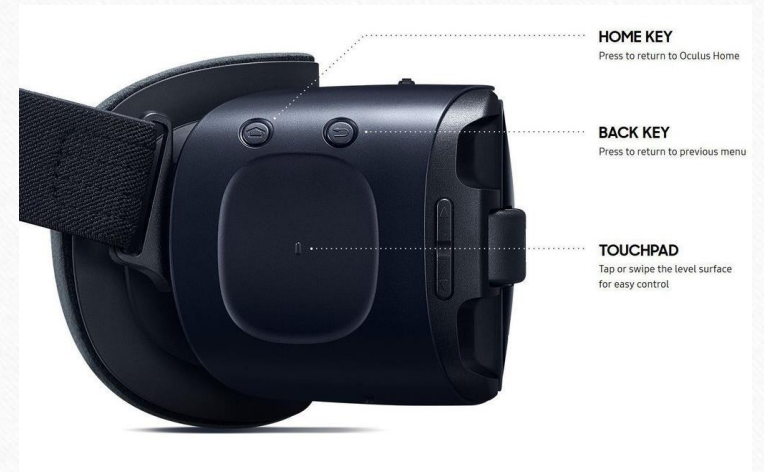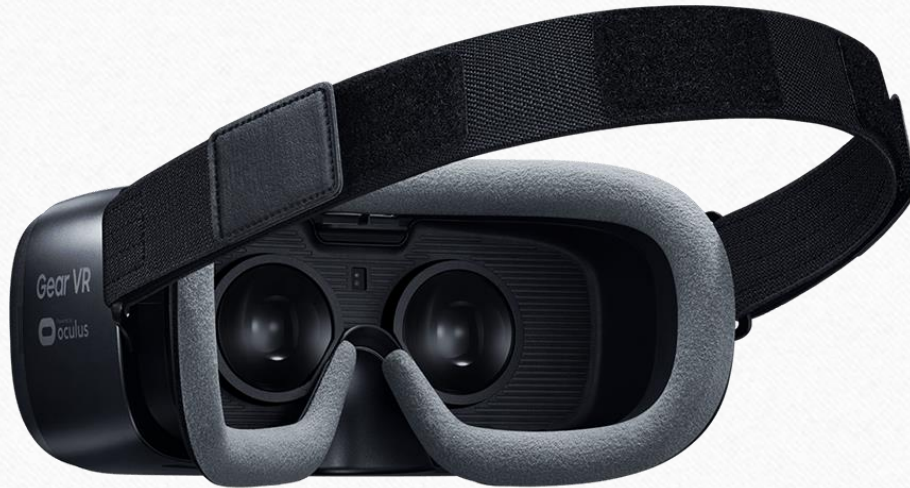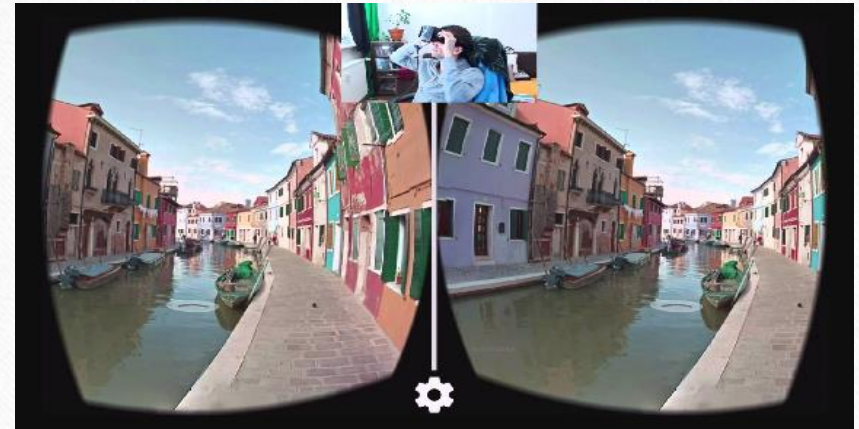

# Virtual Reality (VR)

---

- Immersion = objectively determined degree of detail of the sensory fidelity of a virtual environment
- Presence = feeling of "being there"; subjective, psychological reaction
- Three-dimensional (3D) environment:
  - static 360 ° photos
  - dynamic 360 ° videos
  - interactive 3D environments



# Potential of the technology for the elderly

---

- Ability to visit places without thinking about physical impairments
- "Reliving" thoughts instead of rumination
- Variety for everyday life
- Motivation for therapy and training

# Risks of the technology for the elderly

---

- Lack of interest and acceptance (fear) → technology biography
- Complex usability of the technology
- Cyber Sickness

# Goal of the study

---

- Residents of a LTC institution were asked to try out VR glasses and report their first experiences with Virtual Reality
  - ✓ Finding out if VR is an interesting technology for the elderly
  - ✓ Optimizing the process of introducing VR to the target group
  - ✓ Defining areas of application for VR in LTC from the perspective of the residents



# Research questions

---

- How is the first encounters of older people with virtual reality?
- Which motives and sensations accompany this first encounter?
- What are the possible use cases of VR glasses for the residents?
- Which virtual scenarios do the residents wish to visit with the VR glasses?

# Study

---

- General information about the technology
- Trying out the VR googles: 360° environment meadow with mountains and lake
- Interview
  - VR experience
  - Everyday life today and past
  - Possible use cases for VR
  - Places, they would like to travel

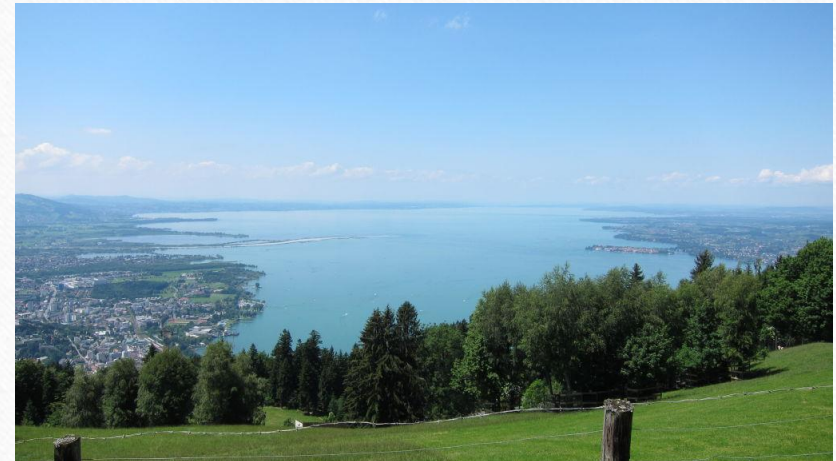



# Inclusion criteria

---

- Resident of the Care Hospital *Haus der Barmherzigkeit* in Vienna
- No dementia diagnosis
- No or low vision restrictions
- Equal distribution of the gender of the participants
- Voluntary participation in the study

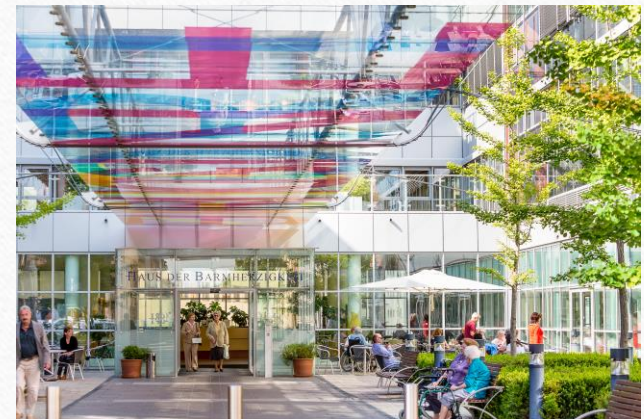

# Description of the sample

---

- Participants: 6 residents 3 male & 3 female
- Age: 68-80 years
- Occupancy: 5-13 years
- Mobility: 5 wheel chair, 1 walker
- MMSE: 27-30 points
- Education: basic school and vocational training



# Results 1

---

- The subjective rating of leisure time influences the interest in the use of VR
- Residents with many appointments
  - less need to use VR glasses in their free time
- Timid residents who have never been on vacation
  - missed opportunities to travel, dream & relax

# Results 2

---

- Technology-interested residents
  - animated environments, videos or games in everyday life or during therapy
- Possible uses for other residents who spend most of their time indoor
  - distraction and change from everyday life



# Results 3

## Use cases for Virtual Reality

---

### Therapy

- **Movement**
- **Language**
- **Memory**
- **Motivation**

### Relaxation

- **Satisfaction**
- **Sleep**
- **Reminiscence**

### Distraction & Variety

- **Escape daily routine**
- **Excursions**
- **To learn new things**

# Results 4

## Places to visit with VR

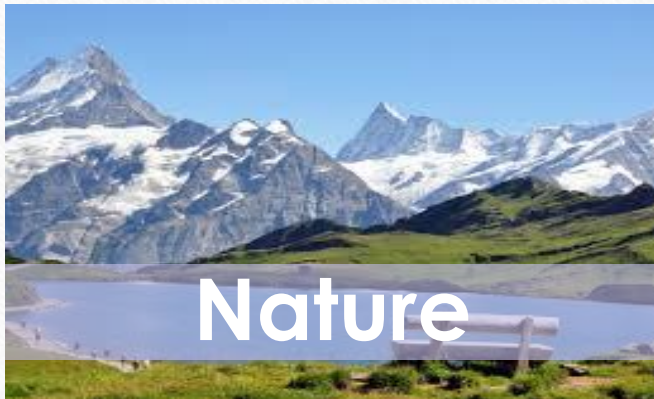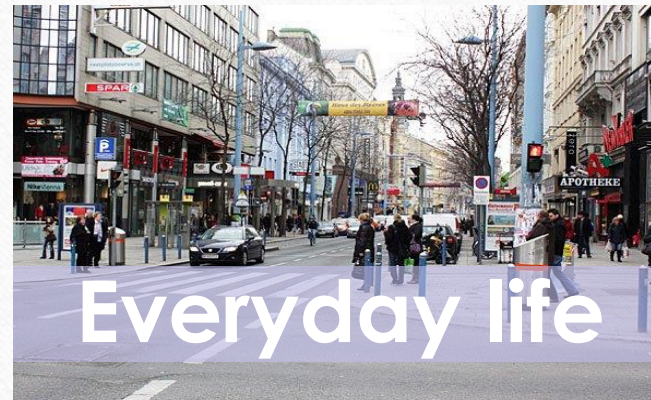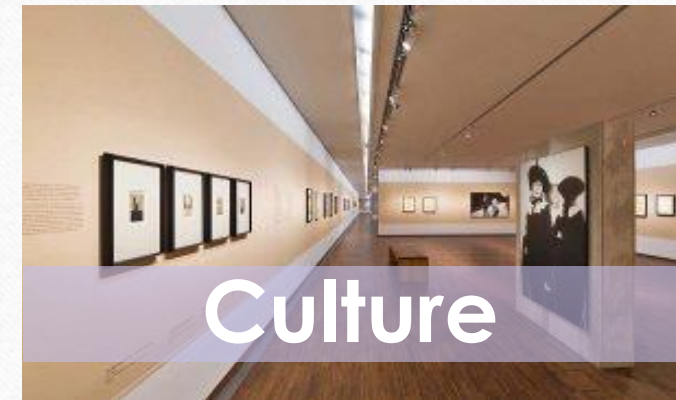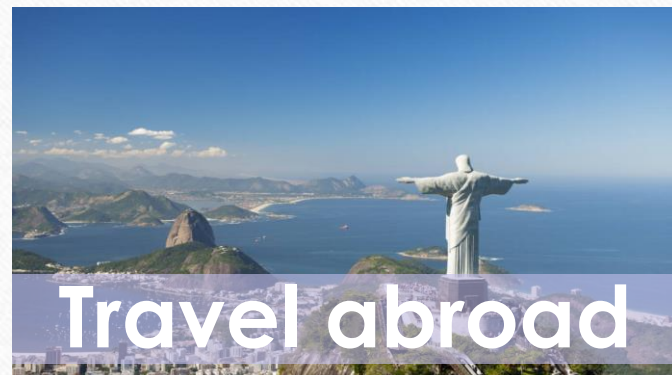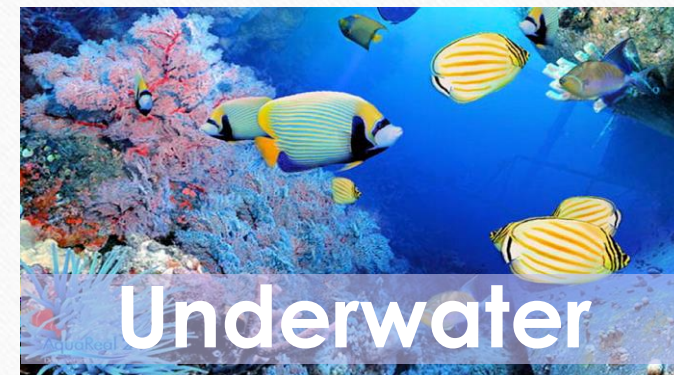



# Description of the sample

---

- Participants: 6 residents 3 male & 3 female
- Age: 68-80 years
- Occupancy: 5-13 years
- Mobility: 5 wheel chair, 1 walker
- MMSE: 27-30 points
- Education: basic school and vocational training

# Conclusion

---

- Various applications in therapy and care for further research and practical application
- An adjustment of the VR glasses is necessary in any case
  - not only for the residents themselves, but also for caregivers!
  - an intuitive control of the technology is necessary!



# Discussion

---

- Do you already have experience with VR glasses in practice?
- Where do you see possible uses for virtual reality?
- ... even in people with dementia?
- ...Under which conditions?

HAUS DER BARMIGKEIT  
Es lebe das Leben.
